# Supplementary material
Source: Springer Nature journal article supplement (https://www.springermedizin.de/resource/supplementary/13075_2009_2584_MOESM5_ESM.pdf/9692424)
Supplement: MOESM5 [file 9692424]

**Table S5** List of 52 genes differentially expressed in Long-standing RA (LSRA) *versus* Controls (C)

| uniqID | IMAGE Id | UGCluster            | Name                                         | Symbol  | LS RA Group mean | C Group mean | Fold change | P value  |
|--------|----------|----------------------|----------------------------------------------|---------|------------------|--------------|-------------|----------|
| 33     | 123991   | Hs.524910            | Ferritin, heavy polypeptide 1                | FTH1    | -0.985           | -0.144       | 6.85        | 1.01E-03 |
| 42     | 122764   | Hs.33642             | Archain 1                                    | ARCN1   | -0.705           | -0.102       | 6.90        | 1.18E-03 |
| 103    | 114323   | Data not found       |                                              |         | -1.319           | -0.275       | 4.79        | 3.08E-03 |
| 111    | 110892   | Hs.533732            | Signal recognition particle 14kDa            | SRP14   | -0.872           | -0.136       | 6.41        | 3.87E-03 |
| 309    | 113173   | Data not found       |                                              |         | 0.360            | -0.096       | -3.76       | 9.25E-03 |
| 362    | 110105   | Hs.701982            | Interleukin 1 receptor, type I               | IL1R1   | 0.204            | -0.010       | -21.11      | 2.13E-03 |
| 623    | 109097   | Hs.397609            | Ribosomal protein S16                        | RPS16   | -0.794           | -0.165       | 4.81        | 9.46E-03 |
| 1351   | 61466    | Hs.292265            | Zinc finger, MYND domain containing 11       | ZMYND11 | -0.839           | 0.115        | -7.29       | 9.91E-03 |
| 1373   | 120298   | Hs.469473            | Ribosomal protein L31                        | RPL31   | -0.469           | -0.017       | 27.65       | 4.92E-03 |
| 1564   | 129473   | Data not found       |                                              |         | -0.864           | -0.008       | 114.92      | 8.99E-03 |
| 1687   | 115389   | Hs.433057            | F-box and leucine-rich repeat protein 7      | FBXL7   | -0.554           | 0.053        | -10.36      | 8.80E-03 |
| 1757   | 109205   | Hs.381061            | Ribosomal protein L19                        | RPL19   | -0.966           | -0.112       | 8.63        | 7.64E-03 |
| 2380   | 116522   | Hs.272168            | Serine incorporator 3                        | SERINC3 | -0.289           | -0.070       | 4.12        | 6.37E-03 |
| 2524   | 116104   | Data not found       |                                              |         | -1.356           | -0.171       | 7.93        | 6.33E-04 |
| 3027   | 111193   | Hs.381219            | Ribosomal protein L15                        | RPL15   | -0.461           | 0.017        | -27.08      | 4.86E-03 |
| 4237   | 72927    | Hs.286226            | Myosin IC                                    | MYO1C   | 0.685            | 0.121        | 5.65        | 5.13E-03 |
| 4309   | 21542    | Hs.635441            | Insulin-like growth factor binding protein 5 | IGFBP5  | -0.843           | -0.037       | 22.99       | 1.87E-03 |
| 4475   | 207054   | Hs.388664            | Ribosomal protein L11                        | RPL11   | -1.004           | -0.163       | 6.16        | 7.16E-03 |
| 4830   | 347570   | In multiple clusters |                                              |         | -0.931           | -0.093       | 10.02       | 7.26E-03 |
| 4981   | 245474   | Hs.361463            | Coagulation factor X                         | F10     | 0.302            | -0.071       | -4.26       | 6.03E-03 |
| 5043   | 234320   | Data not found       |                                              |         | 0.230            | -0.206       | -1.11       | 5.92E-03 |
| 5696   | 110385   | Hs.512619            | Thymidine kinase 2, mitochondrial            | TK2     | 0.282            | -0.148       | -1.91       | 2.22E-03 |
| 5768   | 25214    | In multiple clusters |                                              |         | 0.347            | -0.128       | -2.71       | 8.40E-03 |
| 5924   | 211296   | Hs.687315            | Transcribed locus                            |         | -0.443           | 0.008        | -57.11      | 6.75E-03 |
| 5947   | 78468    | Hs.567508            | Unc-93 homolog A ( <i>C. elegans</i> )       | UNC93A  | 0.513            | 0.005        | 99.63       | 5.41E-03 |
| 6096   | 229446   | Data not found       |                                              |         | 0.383            | 0.0005       | 782.90      | 7.12E-03 |
| 6320   | 211423   | Data not found       |                                              |         | -0.665           | -0.033       | 20.08       | 6.65E-04 |
| 6493   | 243312   | Hs.42009             | Transcribed locus                            |         | -0.488           | -0.024       | 20.65       | 4.68E-03 |

|       |         |                      |                                                |          |        |        |       |          |
|-------|---------|----------------------|------------------------------------------------|----------|--------|--------|-------|----------|
| 6518  | 205115  | Data not found       |                                                |          | -0.596 | -0.086 | 6.96  | 7.67E-03 |
| 6593  | 275950  | Hs.624092            | Transcribed locus                              |          | 0.340  | -0.087 | -3.92 | 8.66E-03 |
| 6682  | 242945  | In multiple clusters |                                                |          | 0.510  | -0.071 | -7.15 | 1.55E-04 |
| 6725  | 208969  | Hs.334846            | Poliovirus receptor-related 1                  | PVRL1    | -0.666 | -0.043 | 15.33 | 5.46E-04 |
| 6761  | 207992  | Hs.444959            | Acyl-Coenzyme A oxidase 2, branched chain      | ACOX2    | -1.041 | -0.271 | 3.84  | 6.63E-03 |
| 6834  | 233942  | Data not found       |                                                |          | 0.353  | -0.072 | -4.91 | 4.79E-03 |
| 7113  | 149287  | Hs.687966            | Transcribed locus                              |          | 0.439  | 0.050  | 8.74  | 7.42E-03 |
| 7585  | 310610  | Hs.567235            | Similar to 40S ribosomal protein S26           | RPS26    | -0.925 | -0.089 | 10.38 | 7.92E-03 |
| 7647  | 293363  | Hs.368592            | Sortilin-related receptor                      | SORL1    | -0.844 | -0.074 | 11.36 | 7.56E-03 |
| 7922  | 42354   | Hs.591916            | cytochrome c oxidase assembly protein          | COX15    | -0.489 | -0.035 | 13.90 | 7.61E-04 |
| 8288  | 327594  | Hs.416024            | Neurensin 2                                    | NRSN2    | -0.542 | -0.009 | 63.65 | 6.47E-03 |
| 8510  | 251584  | Hs.700368            | Ubiquitin-conjugating enzyme E2H               | UBE2H    | -0.599 | -0.123 | 4.85  | 6.58E-03 |
| 9263  | 135813  | Hs.522632            | TIMP metalloproteinase inhibitor 1             | TIMP1    | -1.011 | -0.088 | 11.47 | 3.19E-04 |
| 9479  | 139888  | Hs.486410            | Enoyl Coenzyme A hydratase domain containing 1 | ECHDC1   | -0.738 | -0.079 | 9.33  | 7.18E-03 |
| 9689  | 241175  | Hs.149367            | KIAA0776                                       | KIAA0776 | -1.359 | -0.218 | 6.24  | 4.91E-04 |
| 9707  | 240856  | Hs.50223             | Retinol binding protein 4, plasma              | RBP4     | -0.534 | -0.048 | 11.11 | 8.55E-03 |
| 9717  | 273214  | Hs.529618            | Transferrin receptor (p90, CD71)               | TFRC     | 0.463  | 0.007  | 64.05 | 9.05E-03 |
| 10688 | 814358  | Hs.710399            | Transcribed locus                              |          | 0.478  | -0.077 | -6.19 | 1.21E-03 |
| 10750 | 774178  | Hs.436564            | Prolyl endopeptidase                           | PREP     | 0.554  | -0.064 | -8.64 | 2.97E-03 |
| 11531 | 488838  | Hs.522805            | CD99 molecule-like 2                           | CD99L2   | -0.834 | -0.211 | 3.95  | 6.12E-03 |
| 11690 | 1405525 | Hs.448520            | Solute carrier family 7, member 2              | SLC7A2   | -1.268 | -0.024 | 53.84 | 2.72E-04 |
| 12325 | 759192  | Hs.658789            | ADP-ribosylation factor-like 16                | ARL16    | 0.524  | -0.094 | -5.58 | 5.80E-03 |
| 12792 | 714064  | Hs.436657            | Clusterin                                      | CLU      | -1.553 | -0.086 | 17.99 | 6.70E-03 |
| 13359 | 725204  | Hs.185674            | Zinc finger protein 331                        | ZNF331   | 0.497  | 0.099  | 5.01  | 4.19E-03 |
